# Supplementary material for: Conjugation of a smart polymer to doxorubicin through a pH-responsive bond for targeted drug delivery and improving drug loading on graphene oxide
Source: PubMed Central journal article supplement — RSC Adv. 2021 May 26;11(31):18809–17. doi: 10.1039/d1ra02361f (PMC9033485; doi:10.1039/d1ra02361f), 2021-05-26
Supplement: RA-011-D1RA02361F-s001.pdf [file RA-011-D1RA02361F-s001.pdf]

**Table S1. Examples of pH stimuli-responsive drug delivery systems for DOX.**

| carrier          | Functional group                                     | references |
|------------------|------------------------------------------------------|------------|
| Graphene         | -                                                    | 34         |
| Graphene oxide   | -                                                    | 34         |
| carbon nanotube  | chitosan                                             | 60         |
| carbon nanotube  | -OOC(e)-CNT, OH (e) – CNT, H <sub>2</sub> N(e) - CNT | 61         |
| Graphene         | Folic acid                                           | 62         |
| carbon nanotube  | N-isopropyl acrylamide Carbon                        | 63         |
| black phosphorus | polyethylenimine                                     | 45         |
| Graphene oxide   | Polyethylene glycol                                  | 64         |

**Table S2. Details of the designed simulation boxes.**

| System                   | carrier        | pH  | DOX | No. Water molecules | Box Size (nm <sup>3</sup> ) |
|--------------------------|----------------|-----|-----|---------------------|-----------------------------|
| <i>pGOX/DOX</i>          | graphene oxide | 5.0 | 4   | 12084               | 8.00×8.00×6.00              |
| <i>GOX/DOX</i>           | graphene oxide | 7.4 | 4   | 12166               | 8.00×8.00×6.00              |
| <i>pGOX/PMLA-ami-DOX</i> | graphene oxide | 5.0 | 4   | 12037               | 8.00×8.00×6.00              |
| <i>GOX/PMLA-ami-DOX</i>  | graphene oxide | 7.4 | 4   | 12057               | 8.00×8.00×6.00              |
| <i>pGOX/PMLA-hz-DOX</i>  | graphene oxide | 5.0 | 4   | 12034               | 8.00×8.00×6.00              |
| <i>GOX/PMLA-hz-DOX</i>   | graphene oxide | 7.4 | 4   | 12124               | 8.00×8.00×6.00              |

**Table S3. A summary of MD simulation's states.**

| Stage      | Time(ns) | Time step (fs) |
|------------|----------|----------------|
| <i>NVT</i> | 0.2      | 0.0002         |
| <i>NpT</i> | 0.2      | 0.0002         |
| <i>MD</i>  | 105      | 0.0015         |

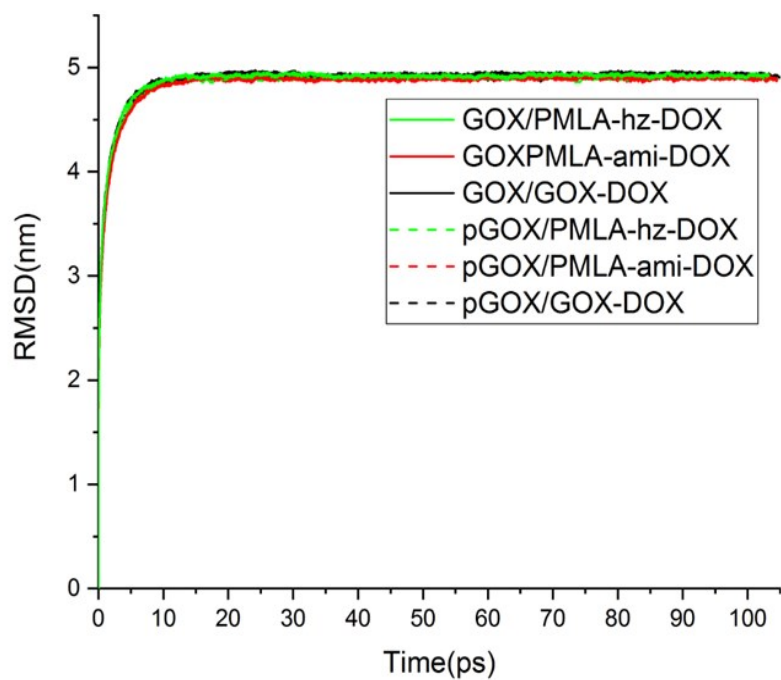

**Figure S1.** RMSD curves for the simulation systems at different pHs.

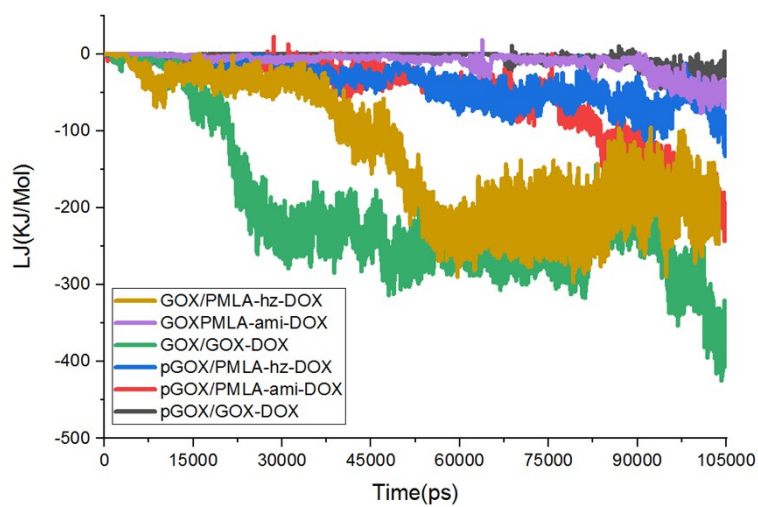

**FigureS2.** The LJ interaction energies of guest molecules and GO interactions in pH level.

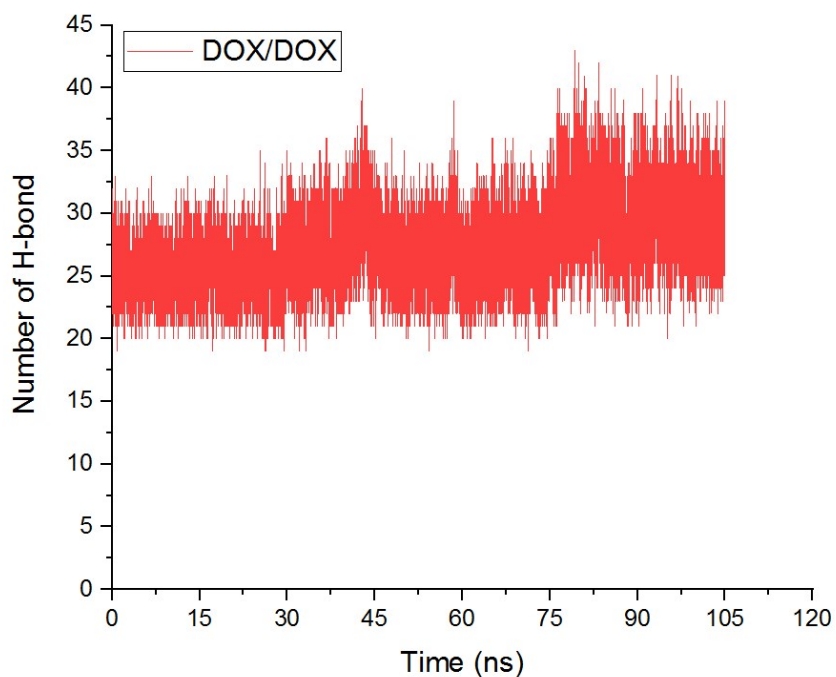

**Figure S3.** The number of hydrogen bond between DOX-DOX molecules in the pGOX / DOX system.

**Figure S4.** The average number of hydrogen bonds in simulation time, between guest molecules and GOX surface, guest molecules and water, GOX and water.

| system           | pair    | Average value |
|------------------|---------|---------------|
| GOX/DOX          | GOX-DOX | 7.466         |
|                  | DOX-Sol | 138.608       |
|                  | GOX-Sol | 822.704       |
| pGOX/DOX         | GOX-DOX | 0.067         |
|                  | DOX-Sol | 130.851       |
|                  | GOX-Sol | 805.180       |
| pGOX/PMLA-hz-DOX | GOX-DOX | 3.556         |
|                  | DOX-Sol | 277.184       |
|                  | GOX-Sol | 806.888       |
| GOX/PMLA-hz-DOX  | GOX-DOX | 7.809         |
|                  | DOX-Sol | 222.998       |
|                  | GOX-Sol | 829.263       |
